# Supplementary material
Source: publisher site journal article supplement (https://www.dovepress.com/get_supplementary_file.php?f=325214.docx)
Supplement: Supplementary file 1 [file get_supplementary_file.php]

**Table S1** Supplementary OR and 95% CI for healthy diet characteristics

|  | *“What do you consider a healthy diet?”* | | |
| --- | --- | --- | --- |
| **Response categories** | **% (n)** | **Odds Ratioa** | **95 % CI** |
| **Dietary variety** |  |  |  |
| T1D (reference)  T2D  General population* | 15.4 (185)  13.8 (135)  12.7 (951) | 1  0.964  0.653 | -  0.712-1.305  0.528-0.809 |
| **Home cooked** |  |  |  |
| T1D (reference)  T2D  General population* | 4.8 (58)  7.1 (69)  3.9 (289) | 1  1.249  0.715 | -  0.835-1.867  0.523-0.977 |
| **Fresh foods/ingredients** |  |  |  |
| T1D (reference)  T2D  General population | 9.8 (118)  8.8 (86)  8.0 (601) | 1  0.766  0.792 | -  0.546-1.076  0.624-1.006 |
| **Organic** |  |  |  |
| T1D (reference)  T2D  General population* | 2.1 (25)  2.7 (26)  3.7 (280) | 1  1.305  2.034 | -  0.725-2.350  1.320-3.132 |
| **Sustainable** |  |  |  |
| T1D (reference)  T2D  General population | 0.2 (3)  0.4 (4)  0.3 (23) | 1  1.270  1.337 | -  0.263-6.128  0.386-4.635 |
| **Low in fat** |  |  |  |
| T1D (reference)  T2D  General population | 14.5 (175)  16.6 (162)  17.1 (1280) | 1  1.118  1.175 | -  0.831-1.506  0.950-1.452 |
| **High in dietary fibre** |  |  |  |
| T1D (reference)  T2D  General population* | 13.0 (157)  11.6 (113)  6.1 (457) | 1  0.914  0.325 | -  0.667-1.252  0.259-0.408 |
| **High in wholegrain foods** |  |  |  |
| T1D (reference)  T2D  General population* | 5.7 (69)  5.9 (58)  2.5 (188) | 1  1.136  0.344 | -  0.757-1.705  0.253-0.468 |
| **Includes whole meal bread e.g. ryebread** |  |  |  |
| T1D (reference)  T2D  General population* | 3.2 (38)  2.6 (25)  2.0 (148) | 1  0.615  0.520 | -  0.355-1.067  0.353-0.765 |
| **High in vegetables** |  |  |  |
| T1D (reference)  T2D  General population* | 16.8 (202)  14.9 (145)  26.0 (1944) | 1  1.050  2.063 | -  0.778-1.419  1.668-2.552 |
| **High in fruit** |  |  |  |
| T1D (reference)  T2D  General population* | 0.4 (5)  0.6 (6)  4.4 (333) | 1  1.724  9.314 | -  0.518-5.737  3.816-22.734 |
| **Includes proteins, vitamins and minerals** |  |  |  |
| T1D (reference)  T2D  General population* | 3.5 (42)  1.6 (16)  6.0 (449) | 1  0.581  1.609 | -  0.314-1.075  1.140-2.270 |
| **Includes lean meat** |  |  |  |
| T1D (reference)  T2D  General population* | 3.7 (44)  4.2 (41)  2.6 (194) | 1  0.959  0.624 | -  0.594-1.549  0.437-0.892 |
| **High in fish** |  |  |  |
| T1D (reference)  T2D  General population | 3.7 (44)  3.8 (37)  3.3 (248) | 1  0.821  0.817 | -  0.507-1.330  0.576-1.558 |
| **Low in added sugar** |  |  |  |
| T1D (reference)  T2D  General population* | 3.3 (40)  5.3 (52)  1.3 (101) | 1  1.590  0.362 | -  0.989-2.557  0.244-0.538 |
| **Total number of responses, % (n)** |  |  |  |
| T1D (reference)  T2D  General population | 100 (1205)  100 (975)  100 (7486) | -  -  - | -  -  - |

Binary logistic regression model adjusted for age, gender and education testing odds ratio for each response category separately in individuals with T1D (reference group), T2D and the general population.

Percentages have been calculated using numbers of responses for each group and each response category divided with total number of responses for each group separately.

aAdjusted for age, gender and education.

CI, confidence interval; T1D, Type 1 diabetes; T2D, type 2 diabetes.

*Significantly different OR and 95% CI compared with T1D (reference group).


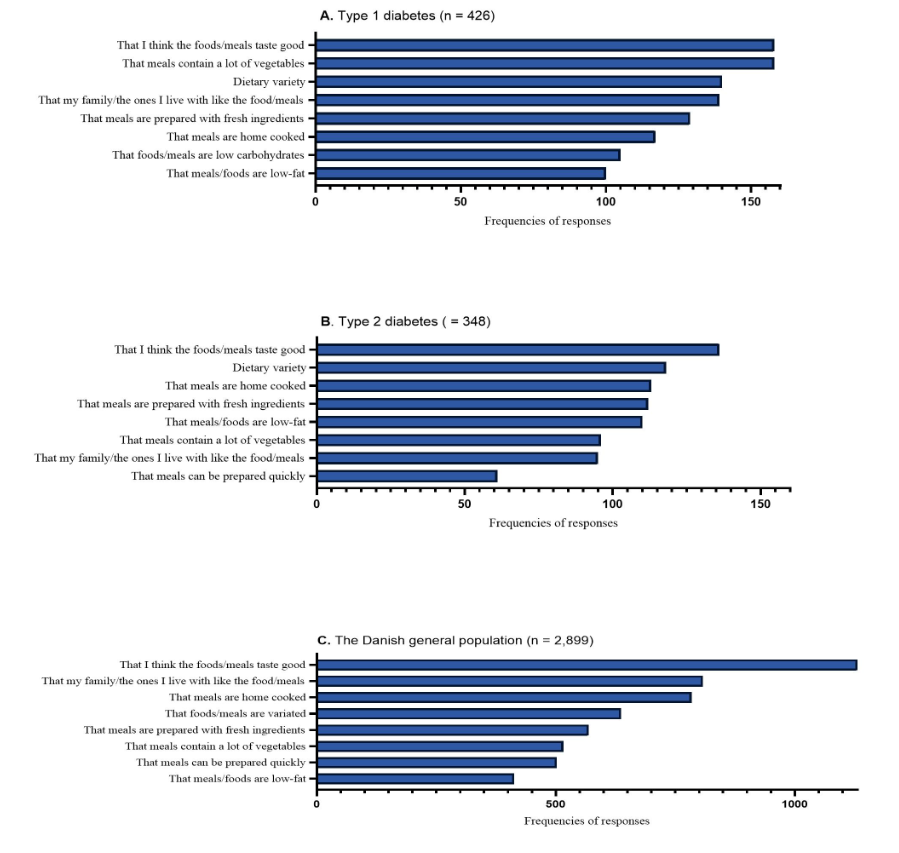


Figure S1. Frequencies of reported reasons for choosing which foods or meals to eat: A) in patients with type 1 diabetes, B) in patients with type 2 diabetes and C) in the Danish general population. In the online diabetes survey the question was *”What do you think is most important when you cook or buy groceries?”* and in the DANSDA survey of the general population the question was *”What do you think is most important when you choose dinner meals?”*. In the online diabetes survey up to three answers were accepted and in DANSDA only two answers were accepted. The same response categories were used in both surveys.


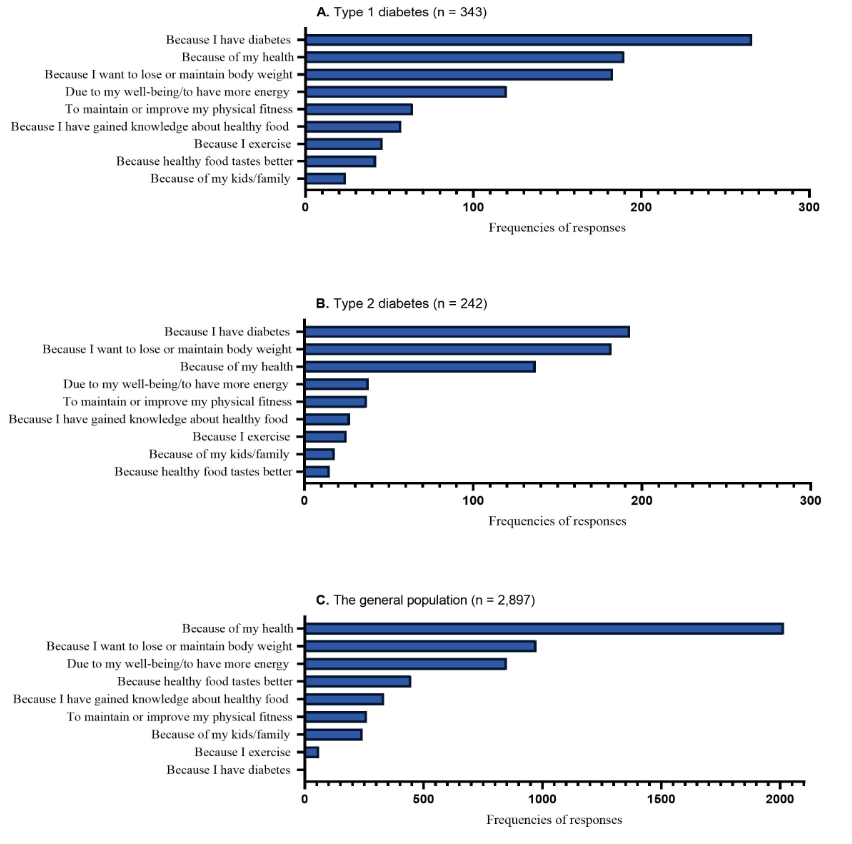


Figure S2. Frequencies of reported reasons for aiming to eat healthily often or very often: A) in patients with type 1 diabetes, B) in patients with type 2 diabetes and C) in the Danish general population. Only patients with diabetes reporting to eat healthily every day ”often” or ”very often” were asked this question. In both surveys the question was *”What is the most important reason why you aim to eat healthily?”* with up to three accepted answers in the online diabetes survey and up to two accepted answers in the DANSDA survey of the general population. The same response categories were used in both surveys except for *”because I have diabetes”* which was an additional question in the online diabetes survey.
